# Supplementary material for: The kinome of pineapple: catalog and insights into functions in crassulacean acid metabolism plants
Source: PubMed Central journal article supplement (PMC6145126; doi:10.1186/s12870-018-1389-z), 2018-09-18

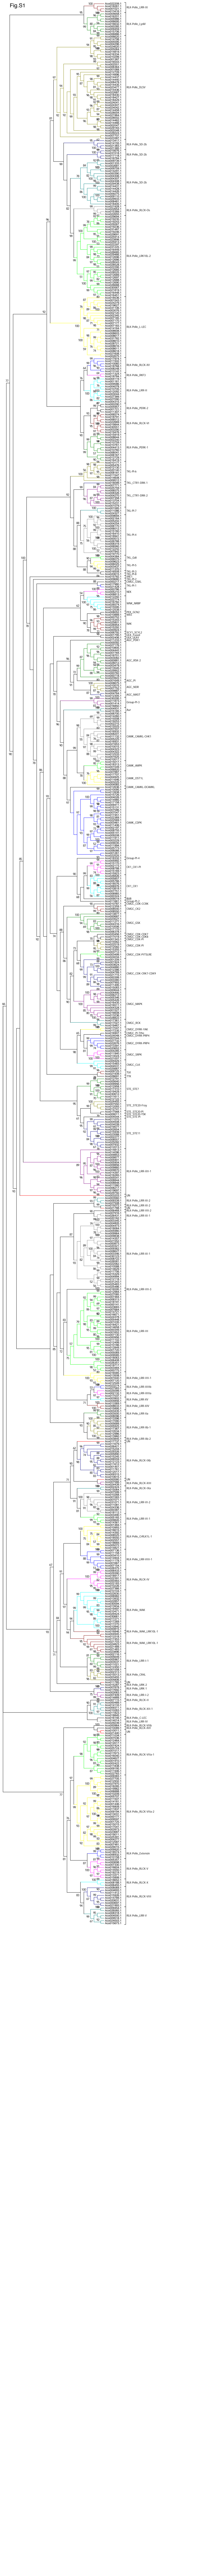

Supplement: 12870_2018_1389_MOESM2_ESM.pdf [file 12870_2018_1389_MOESM2_ESM.pdf]
